RESEARCH ARTICLE

# Molecular characterization of *Neisseria meningitidis* isolates recovered from 11-19-year-old meningococcal carriers in Salvador, Brazil

Ana Rafaela Silva Simões Moura<sup>1</sup>, Cécilia Batmalle Kretz<sup>2</sup>, Italo Eustáquio Ferreira<sup>1</sup>, Amélia Maria Pithon Borges Nunes<sup>1</sup>, José Cássio de Moraes<sup>3</sup>, Mitermayer Galvão Reis<sup>1</sup>, Alan John Alexander McBride<sup>1,4</sup>, Xin Wang<sup>2</sup>, Leila Carvalho Campos<sup>1\*</sup>

**1** Laboratório de Patologia e Biologia Molecular, Instituto Gonçalo Moniz, FIOCRUZ-BA, Salvador, Bahia, Brazil, **2** Meningitis and Vaccine Preventable Diseases Branch, Division of Bacterial Diseases, Centers for Disease Control and Prevention, Atlanta, United States of America, **3** Faculdade de Ciências Médicas da Santa Casa de São Paulo, São Paulo, Brazil, **4** Núcleo de Biotecnologia, Centro de Desenvolvimento Tecnológico, Universidade Federal de Pelotas, Pelotas, Rio Grande do Sul, Brazil

\* [lccampos@bahia.fiocruz.br](mailto:lccampos@bahia.fiocruz.br)

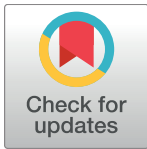

**OPEN ACCESS**

**Citation:** Moura ARSS, Kretz CB, Ferreira IE, Nunes AMPB, de Moraes JC, Reis MG, et al. (2017) Molecular characterization of *Neisseria meningitidis* isolates recovered from 11-19-year-old meningococcal carriers in Salvador, Brazil. PLoS ONE 12(9): e0185038. <https://doi.org/10.1371/journal.pone.0185038>

**Editor:** Daniela Flavia Hozbor, Universidad Nacional de la Plata, ARGENTINA

**Received:** June 24, 2017

**Accepted:** September 4, 2017

**Published:** September 20, 2017

**Copyright:** © 2017 Moura et al. This is an open access article distributed under the terms of the [Creative Commons Attribution License](https://creativecommons.org/licenses/by/4.0/), which permits unrestricted use, distribution, and reproduction in any medium, provided the original author and source are credited.

**Data Availability Statement:** The genome sequences of the isolates have been deposited in the PUBMLST database (IDs 54017-54063).

**Funding:** This work was supported by Ministério da Saúde, Brazil (<http://portalsaude.saude.gov.br/index.php/o-ministerio/principal/secretarias/svs>) (grant number TC335/2013) [LCC], and Fundação de Amparo à Pesquisa do Estado da Bahia – FAPESB (<http://www.fapesb.ba.gov.br>) (grant number SUS 007/2014) [LCC]. The funders had no

## Abstract

Characterization of meningococci isolated from the pharynx is essential towards understanding the dynamics of meningococcal carriage and disease. Meningococcal isolates, collected from adolescents resident in Salvador, Brazil during 2014, were characterized by multilocus sequence typing, genotyping or whole-genome sequencing. Most were nongroupable (61.0%), followed by genogroups B (11.9%) and Y (8.5%). We identified 34 different sequence types (STs), eight were new STs, distributed among 14 clonal complexes (cc), cc1136 represented 20.3% of the nongroupable isolates. The *porA* and *fetA* genotypes included P1.18,25–37 (11.9%), P1.18–1,3 (10.2%); F5-5 (23.7%), F4-66 (16.9%) and F1-7 (13.6%). The *porB* class 3 protein and the *fHbp* subfamily A (variants 2 and 3) genotypes were found in 93.0 and 71.0% of the isolates, respectively. NHBA was present in all isolates, and while most lacked *NadA* (94.9%), we detected the hyperinvasive lineages B:P1.19,15:F5-1:ST-639 (cc32); C:P1.22,14–6:F3-9:ST-3780 (cc103) and W:P1.5,2:F1-1:ST-11 (cc11). This is the first report on the genetic diversity and vaccine antigen prevalence among *N. meningitidis* carriage isolates in the Northeast of Brazil. This study highlights the need for ongoing characterization of meningococcal isolates following the introduction of vaccines and for determining public health intervention strategies.

## Introduction

*Neisseria meningitidis* is a human commensal bacterium that commonly colonizes the oropharyngeal mucosa, occasionally causing life-threatening disease, such as meningitis or septicemia [1] Meningococcal populations possess a diverse and dynamic structure [2,3]. However, most

role in study design, data collection and analysis, decision to publish, or preparation of the manuscript.

**Competing interests:** The authors have declared that no competing interests exist.

invasive meningococcal cases are caused by a limited number of clonal complexes (cc), known as hyperinvasive lineages, which persistently exist over time despite high rates of recombination [3,4]. The population structure of meningococcal carriage strains is less well defined [5] and some are associated with hypervirulent lineages [6]. Most carriage meningococci lack a capsule and are thus nongroupable (NG). However, commensal strains may play an important role as a reservoir of virulence genes, with implications for meningococcal diversity due to the high frequency of recombination [3].

Multilocus sequence typing (MLST) is used for studying population biology and the evolution of microorganisms [4] and the PubMLST database allows the comparison of global meningococcal strains [7]. While MLST has a low discriminatory power, this has been overcome by characterizing the genes encoding several outer membrane proteins, including: porins A (PorA) and B (PorB) and iron-regulated enterobactin (FetA) [8]. Typing of factor H-binding protein (FHbp), Neisserial adhesion A (NadA) and Neisserial heparin binding antigen (NHBA) can also improve meningococcal typing and provide information on strain coverage conferred by the serogroup B meningococcal (MenB) vaccines [9]. These antigens were used in the development of two MenB vaccines, the MenB-4C multi-component recombinant vaccine and the MenB-FHbp bivalent vaccine [9, 10].

In Brazil, meningococcal disease is endemic with an annual incidence of 1.5–2.0 cases per 100,000 inhabitants [11]. Serogroup C has been responsible for most cases and is historically associated with ST-11 during the 1970s and ST-103 after 2000 [12]. However, there is only limited data describing meningococcal carriage in Brazil [13,14].

Characterization of meningococci isolated from the pharynx is essential towards understanding the dynamics of meningococcal carriage and disease and to determine the potential impact of disease control programs, such as vaccination, on the transmission of meningococci. In 2014, we conducted a cross-sectional study to assess the meningococcal carriage status of 11-19-year-old student's resident in Salvador [15]. In the current work, the meningococcal carriage isolates were characterized by capsular group, ST, and the presence and sequence variability of the *porA*, *porB*, *fetA*, *fHbp*, *nhba*, and *nadA* genes.

## Materials and methods

### Ethics statement

This study was approved by the Ethics Committee at the Gonçalo Moniz Institute, FIO-CRUZ-BA (CAEE # 16099713.1.0000.0040). Written informed consent from all participants (or guardians) in the study were obtained before sample and data collection.

### Meningococcal isolates

Meningococcal isolates ( $n = 59$ ) were recovered from oropharyngeal swabs collected from 1,200 students, aged 11–19 years old, attending 134 public schools in Salvador, Brazil, during September-December 2014. Some 59 participants (4.9%) were found to be meningococcal carriers as described previously [15]. The swab was immediately plated onto a selective agar medium (modified Thayer-Martin vancomycin, colistin, nystatin, and trimethoprim) and introduced in plastic tubes containing 1 mL of skim milk-tryptone-glucose-glycerin (STGG) transport medium [16]. Meningococcal identification was determined by Gram staining (BD BBL, Sparks, MD), the oxidase reaction (BD BBL Dryslide, Cockeysville, MD), and carbohydrate utilization tests. Results were confirmed by API-NH<sup>®</sup> strips (bioMérieux, Hazelwood, MO). The isolates were stored at  $-80^{\circ}\text{C}$  in brain heart broth with 20% glycerol.

## Capsular typing

Capsular groups were characterized by real-time PCR (qPCR), the primers and probes for the *ctrA* and *sodC* genes and for serogroups A, B, C, W, Y and X were used as described previously [17,18]. The capsule null locus (*cnl*) was detected by PCR amplification and sequencing as described previously [19].

## Multilocus sequence typing (MLST)

MLST was performed according to the method described by Maiden et al. [4]. STs and cc were assigned by searching the *Neisseria* PubMLST database (<http://pubmlst.org/neisseria/>). Sequence data were assembled and alleles were determined using the Meningococcus Genome Informatic Platform (MGIP, <http://mgip.biology.gatech.edu>) or SeqMan Pro, ver12.2 (DNASTAR, Inc.).

## Outer membrane protein typing

The amplification and sequencing of the *porA*, *porB*, *fetA*, *fHbp*, *nhba* and *nadA* genes were performed as previously described [20–23]. Alleles and protein variants were assigned using the *Neisseria* PubMLST database.

## Whole-genome sequencing

The *N. meningitidis* isolates that were not fully characterized by molecular typing were analyzed by whole-genome sequencing. Genomic DNA was extracted [24] and sequenced using MiSeq v2 chemistry (Illumina, San Diego, CA, USA). Genome assembly was carried out using CLC Genomics Workbench, ver 9.0.0 (CLC bio, Aarhus, Denmark) with read trimming and mapping of reads back to contigs. The MLST alleles, STs and cc were identified by comparison of the assembled genomes with PubMLST [7] alleles using a BLAST search (<https://blast.ncbi.nlm.nih.gov/Blast.cgi>). Sequences of PorA, PorB, FetA, NadA, NHBA and FHbp were identified as described previously [24].

## Phylogenetic analysis

Single nucleotide polymorphisms (SNPs) were identified using kSNP version 3 software [25] with a kmer length of 25. A maximum likelihood phylogenetic tree was constructed from the core SNPs and the Tamura-Nei model, using MEGA7 [26] and 500 bootstraps iterations.

## Results

### Capsular typing

Of the 59 *N. meningitidis* isolates analyzed, 61.0% (36/59) were NG, and 50.0% (18/36) lacked capsular genes (capsule null). Most groupable isolates belonged to genogroup B (7/59; 11.9%), followed by Y (5/59; 8.5%), E (4/59; 6.8%), Z (3/59; 5.1%), C (2/59; 3.4%) and W (2/59; 3.4%). None of the study participants were colonized by either *N. meningitidis* genogroup A or genogroup X.

### MLST profiles

Thirty-four different STs were identified, eight (23.5%) of which were described for the first time in this study and were registered in the PubMLST database (Table 1). Overall, 83.1% (49/59) of the isolates fell into 14 known cc. The most frequent were cc1136 ( $n = 12$ ; 20.3%) and cc198 ( $n = 11$ ; 18.6%), in NG strains. Hyperinvasive lineage complexes were also detected

Table 1. Genotypic characterization of the 59 *N. meningitidis* isolates.

| Capsular Type | ST           | Clonal Complex | PorA          | PorB  | FetA   | FHbp† | NHBA‡ | NadA  | N° of Isolates |
|---------------|--------------|----------------|---------------|-------|--------|-------|-------|-------|----------------|
| B             | 639          | 32             | P1.19,15      | 3–1   | F5-1   | 2.19  | 231   | 1.1   | 1              |
|               | 2120         | 41/44          | P1.18–7,9     | 3–16  | F1-5   | 2.19  | 2     | No    | 1              |
|               | <b>11453</b> | NA             | P.1.19,15–1   | 3–45  | F1-7   | 2.24  | 21    | No    | 1              |
|               | 3200         | 4821           | P1.17–6,23–6  | 3–372 | F3-36  | 2.16  | 669   | No    | 1              |
|               | 3496         | 213            | P1.22,14–26   | 3–14  | F5-9   | 3.45  | 18    | 4/5   | 1              |
|               | <b>11577</b> | 41/44          | P1.22,14–6    | 3–64  | F1-199 | 2.19  | 291   | No    | 1              |
|               | 5892         | 41/44          | P1.7–2,13–1   | 3–66  | F4-38  | 2.19  | 335   | No    | 1              |
| C             | 3771         | 35             | P1.7–2,13–7   | 3–154 | F1-7   | 2.24  | 21    | No    | 1              |
|               | 3780         | 103            | P1.22,14–6    | 2–23  | F3-9   | 2.25  | 24    | No    | 1              |
| W             | 11           | 11             | P1.5,2        | 2–3   | F1-1   | 2.151 | 29    | 2/3   | 1              |
|               | 7097         | 11             | P1.5,2        | 2–3   | F1-1   | 2.151 | 29    | 2/3   | 1              |
| Y             | <b>11545</b> | NA             | P1.5–1,10–4   | 3–100 | F1-7   | 2.21  | 9     | No    | 1              |
|               | 23           | 23             | P1.5–2,10–2   | 3–53  | F1-3   | 2.104 | 8     | No    | 1              |
|               | <b>11452</b> | NA             | P1.18–1,3     | 2–194 | F3-4   | 2.16  | 20    | No    | 1              |
|               | <b>11461</b> | 23             | P1.7–2,1      | 3–36  | F1-5   | 2.21  | 145   | No    | 1              |
|               | 5770         | 175            | P1.5–1,10–3   | 3–100 | F1-7   | 2.21  | 9     | No    | 1              |
| E             | 10220        | 254            | P1.7–1,1      | 3–38  | F3-67  | 1.13  | 9     | No    | 2              |
|               | 10220        | 254            | P1.7–1,1      | 3–38  | F3-67  | 2.104 | 9     | No    | 1              |
|               | 10224        | 254            | P1.21,16      | 3–320 | F3-9   | 1.13  | 9     | No    | 1              |
| Z             | <b>11458</b> | NA             | P.19,15       | 3–1   | F5-7   | 2.16  | 101   | 2/3.8 | 1              |
|               | 2123         | NA             | P1.18–1,3     | 3–38  | F5-7   | 2.25  | 101   | No    | 1              |
|               | 5953         | NA             | P1.18–1,30–2  | 3–63  | F5-7   | 2.22  | 92    | No    | 1              |
| NG            | 823          | 198            | P1.18,25–37   | 3–84  | F5-5   | 1.4   | 10    | No    | 3              |
|               | 6525         | NA             | P1.5–11,10–13 | 3–100 | F1-7   | 2.21  | 101   | No    | 2              |
|               | 1136         | 1136           | P1.18–1,3–4   | 3–84  | F4-66  | 3.94  | 600   | No    | 2              |
|               | 1136         | 1136           | P1.18–1,3     | 3–84  | F4-66  | 3.94  | 600   | No    | 1              |
|               | 4210         | 178            | P1.19–5,15–23 | 3–38  | F1-7   | 1.12  | 6     | No    | 1              |
|               | 823          | 198            | P1.18,25–37   | 3–84  | F5-5   | 1.1   | 10    | No    | 1              |
|               | 823          | 198            | P1.18,25–44   | 3–84  | F5-5   | 1.4   | 10    | No    | 1              |
|               | 823          | 198            | P1.18–1,30–4  | 3–381 | F5-5   | 1.4   | 10    | No    | 1              |
|               | 1136         | 1136           | P1.18–1,3–8   | 3–84  | F4-66  | 3.31  | 600   | No    | 1              |
|               | 6519         | 23             | P1.18–1,30–2  | 3–36  | F5-5   | 2.21  | 145   | No    | 1              |
|               | 6519         | 23             | P1.18–1,30    | 3–36  | F5-5   | 2.21  | 145   | No    | 1              |
|               | 6525         | NA             | P1.5–11,10–13 | 3–100 | F1-7   | 2.21  | 9     | No    | 1              |
|               | <b>11451</b> | 198            | P1.18,25–37   | 3–84  | F5-5   | 1.4   | 10    | No    | 1              |
|               | 639          | 32             | P1.19,15      | 3–1   | F5-1   | 2.19  | 145   | 1.1   | 1              |
| cn§           | 1136         | 1136           | P1.18–1,3     | 3–84  | F4-66  | 3.94  | 600   | No    | 3              |
|               | 823          | 198            | P1.18,25–37   | 3–84  | F5-5   | 1.4   | 10    | No    | 2              |
|               | 53           | 53             | P1.7,30–3     | 3–64  | F1-2   | 2.102 | 58    | No    | 2              |
|               | 53           | 53             | P1.7–2,30–3   | 3–64  | F1-5   | 2.102 | 58    | No    | 1              |
|               | 53           | 53             | P1.7,30–2     | 3–64  | F1-5   | 2.102 | 65    | No    | 1              |
|               | 53           | 53             | P1.7,30–45    | 3–64  | F1-2   | 2.102 | 58    | No    | 1              |
|               | 823          | 198            | P1.18,25–32   | 3–37  | F5-5   | 1.4   | 10    | No    | 1              |
|               | 1136         | 1136           | P1.18–1,3–7   | 3–84  | F4-66  | 3.94  | 600   | No    | 1              |
|               | 7129         | NA             | P1.12–6,13–39 | 3–122 | F5-5   | 3.627 | 308   | No    | 1              |
|               | 7450         | 1136           | P1.18,25      | 3–37  | F2-7   | 3.94  | 145   | No    | 1              |

(Continued)

Table 1. (Continued)

| Capsular Type | ST           | Clonal Complex | PorA          | PorB | FetA       | FHbp† | NHBA‡ | NadA | N° of Isolates |
|---------------|--------------|----------------|---------------|------|------------|-------|-------|------|----------------|
|               | <b>11459</b> | 1136           | P1.18–4,25–60 | 3–84 | <b>-¶¶</b> | 3.31  | 262   | No   | 1              |
|               | <b>11462</b> | 198            | P1.22–1,14–23 | 3–84 | F5-5       | 1.4   | 10    | No   | 1              |
|               | 10238        | 1136           | P1.18–4,25–50 | 3–84 | F4-66      | 3.94  | 600   | No   | 1              |
|               | <b>11552</b> | 1136           | P.18-1,3–8    | 3–84 | F4-66      | 3.94  | 600   | No   | 1              |

\* ST, sequence type; PorA, porin A; PorB, porin B; FetA, iron-regulated enterobactin; FHbp, factor H binding protein; NHBA, neisserial heparin binding antigen; NadA, *Neisseria* adhesion A; NA, clonal complex not assigned; NG, non genogroupable. The new STs that were described for the first time in this study are indicated in bold.

†Nomenclature using variant peptide subvariant.

‡Novartis nomenclature.

¶PorA VR2 variant was not found.

§*cnI*, Capsule null locus.

¶¶*fetA* gene deleted.

<https://doi.org/10.1371/journal.pone.0185038.t001>

and included: cc23 ( $n = 4$ ; 6.8%); cc41/44 ( $n = 3$ ; 5.1%); cc32 ( $n = 2$ ; 3.4%), cc11 ( $n = 2$ ; 3.4%), cc35 ( $n = 1$ ; 1.7%), cc103 ( $n = 1$ ; 1.7%) and cc175 ( $n = 1$ ; 1.7%) (Table 1).

An association between the capsular groups and cc was observed: cc1136, cc198 and cc53 were associated with NG strains; cc32 and cc41/44 were found among serogroup B isolates; cc103 was related to serogroup C strains, and cc11 was found among serogroup W isolates (Fig 1). Furthermore, three NG strains were associated with the hypervirulent cc23 ( $n = 2$ ) and cc32 ( $n = 1$ ).

Using the European Meningococcal Disease Society (EMGM) recommended strain designation for meningococci [8], we identified 44 finetypes including: NG:P1.18,25–37:F5-5:ST-823 (cc198) ( $n = 7$ ; 11.9%) and NG:P1.7–1,1:F4-66:ST-1136 (cc1136) ( $n = 4$ ; 6.8%). We also found isolates belonging to the hyperinvasive lineages W:P1.5,2:F1-1:ST-11 (cc11) ( $n = 1$ ), B:P1.19,15:F5-1:ST-639 (cc32) ( $n = 1$ ), C:P1.22,14–6:F3-9:ST-3780 (cc103) ( $n = 1$ ) (Table 1).

## Outer membrane protein typing

The *porA*, *porB*, *fetA*, *fHbp*, *nhba*, and *nadA* genes were characterized in all 59 isolates (Table 1). A total of 36 different PorA types (P1.VR1,VR2) were identified, including 18 VR1 variants and 34 VR2 variants. The most common PorA was P1.18,25–37 ( $n = 7$ , 11.9%), followed by P1.18–1,3 ( $n = 6$ , 10.2%). None of the isolates contained the VR2 variant 4 present in the MenB-4C vaccine and only one serogroup Y (cc23) isolate contained the VR2 variant 4 (Table 1). We found a predominance of PorB class 3 proteins ( $n = 55$ , 93.2%), and PorB 3–84 ( $n = 20$ , 33.9%) was the most prevalent. We also identified five novel PorB genotypes: 2–194, 3–36, 3–122, 3–320, and 3–381 (Table 1).

Among the 17 FetA variants identified, the most frequent was F5-5 ( $n = 14$ , 23.7%), followed by F4-66 ( $n = 10$ , 16.9%) and F1-7 ( $n = 8$ , 13.6%). The *fetA* gene was deleted in only one NG isolate belonging to cc1136; five isolates belonging to different cc included FetA variants that are associated with hypervirulent lineages, including F5-1 ( $n = 2$ ), F3-9 ( $n = 2$ ), and F2-7 ( $n = 1$ ) [27].

All three variants (two subfamilies) of the vaccine antigen FHbp were identified, the v2 variant was the most prevalent ( $n = 30$ ; 50.8%), followed by v1 ( $n = 15$ ; 25.4%) and v3 ( $n = 14$ ; 23.7%). Overall, the most prevalent FHbp subvariants were: FHbp-3.94 ( $n = 10$ ; 16.9%) and

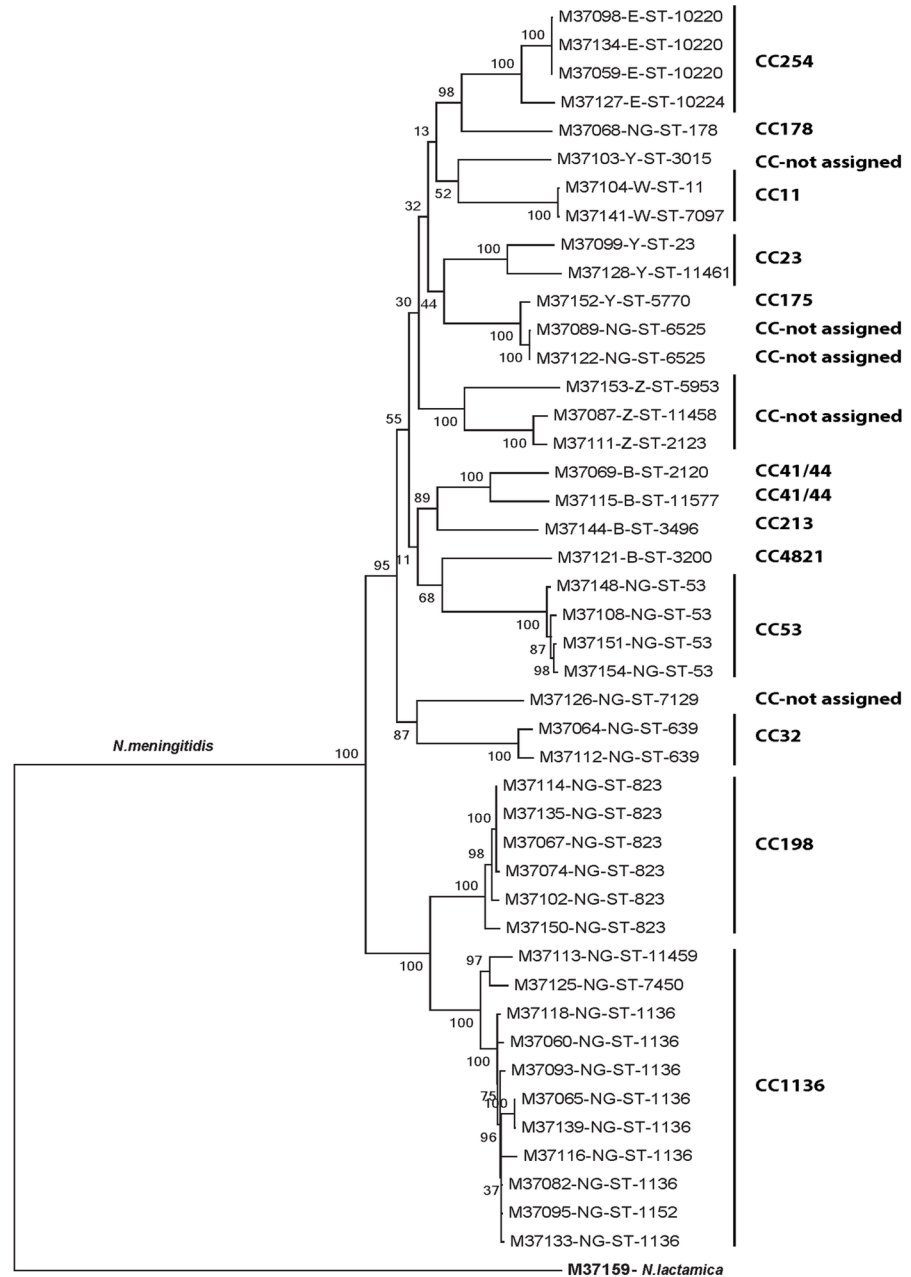

**Fig 1. Phylogenetic tree of the *N. meningitidis* isolates based on the whole-genome sequence data.** The *N. meningitidis* isolates are labelled with their sample ID, serogroup (SG), sequence type (ST) and clonal complex (cc). An *N. lactamica* isolate was used as the outgroup. Internal nodes are labeled with bootstrap values. The scale bar is based on the 7131 positions in the core SNP matrix and indicated nucleotide substitutions per site.

<https://doi.org/10.1371/journal.pone.0185038.g001>



FHbp-1.4 ( $n = 10$ ; 16.9%), associated with cc1136 and cc198, respectively; FHbp-2.21 ( $n = 8$ ; 13.6%), associated with cc23 (3 isolates), cc175 (1 isolate), or were not assigned to any cc (4 isolates). FHbp-1.1, present in the MenB-4C vaccine [28], was found in only one isolate associated with cc198 (Table 1).

We identified 20 unique NHBA subvariants: NHBA-10 was the most frequent ( $n = 11$ , 18.6%), associated with cc198, followed by NHBA-600 ( $n = 10$ , 16.9%), associated with cc1136 (Table 1). Only one isolate (genogroup B; cc41/44) contained the NHBA-2 variant that is included in the MenB-4C vaccine. Most of the isolates lacked *nadA* ( $n = 56$ , 94.9%), and none of the isolates included the NadA-3 variant present in the MenB-4C vaccine [28].

## Genomic diversity of the *N. meningitidis* isolates

The genetic relatedness of the 45 *N. meningitidis* isolates that could not be fully characterized by molecular typing was assessed using whole-genome sequencing. The phylogenetic analysis revealed that isolates from the same cc clustered together (Fig 1). A total of 7131 core SNPs were identified with a difference of 0–3847 between all isolates analyzed.

## Discussion

In the present study, we evaluated the molecular characteristics of meningococcal carriage isolates recovered from 11–19-year-old students, resident in Salvador, Brazil. Most of the *N. meningitidis* isolates were NG, which is consistent with other carriage studies [19,28,29]. Although the capsule is not required for person-to-person transmission [19] there is evidence that loss of the capsule enhances the capacity of meningococci to colonize the human nasopharynx and to avoid human defense systems [30]. Furthermore, in some instances, capsule-deficient strains have caused invasive disease [31].

Among the groupable carriage isolates, the most common included genogroups MenB and MenY, in agreement with previous reports [28,32,33]. In addition, we found a low prevalence of MenC carriage among the students, which may be related to the mass vaccination campaign with a MenC conjugate vaccine that was conducted in Salvador in 2010 [34]. Although the vaccination status of the participants was not available, the MenC vaccination campaign for 10–24-year-olds may have had some effect on the low MenC colonization rates seen in this study. As seen in studies from the United Kingdom, the introduction of a MenC conjugate vaccine to the adolescent and young adult population was responsible for a 67% reduction in MenC colonization rates compared to non-vaccinated individuals [35]. However, we were unable to evaluate the impact of MenC conjugate vaccine on meningococcal carriage due to the lack of baseline carriage data prior to the vaccination campaign.

Molecular typing revealed that the *N. meningitidis* isolates were highly diverse, as expected for a carrier population [2]. We characterized 34 STs belonging to 14 cc and found an association with some of the capsular groups, as previously reported [29,36]. The cc1136 and cc198 were most common and, as observed in our study, these cc can be found among carriage and *cnl*-positive isolates [36]. Indeed, the genetic relatedness of the 45 isolates analyzed by whole-genome sequencing found that isolates belonging to the same cc were more closely related and formed distinct phylogenetic clusters (Fig 1).

In agreement with previous reports of carriage and invasive isolates, we found an association between genogroup B and cc41/44, cc32 and cc4821 [6,28,33]. Interestingly, one of the NG cc32 isolates clustered with a genogroup B cc32 isolate and had the same genotype profile except for the NHBA protein variant (Table 1). This NG cc32 isolate lacked the *csb* gene, which is required for capsule synthesis.

Genogroup Y was associated with cc23 and cc175 and isolates belonging to cc23 have been reported to be involved with invasive disease in the USA, South America, Europe and South Africa [37]. Furthermore, cc175 was responsible for over 17% of MenY invasive cases in Brazil, during 2007–2011 [38]. These results demonstrate the continuing circulation of pathogenic isolates among carriers.

Previous studies found that a small proportion of carriage isolates belonged to hyperinvasive lineages [6,29]. Furthermore, it is known that these lineages can persist over many decades and spread around the world, despite high rates of recombination [3]. In this study, we identified three hyperinvasive isolates associated with meningococcal disease cases in Brazil. Of note, the strain C:P1.22,14–6:F3-9:ST-3780 (cc103), differing only in the PorA VR1 subtype, is responsible for most meningococcal disease cases in Brazil. It was also identified as the causative agent of the last outbreak that occurred in Bahia State, Brazil, in 2010 [34,39]. The MenB hyperinvasive isolate B: P1.19,15: F5-1: ST-639 (cc32) has been found in almost all Brazilian states, with the highest prevalence in the Northeast region [40]. Similarly, the genogroup W isolate, with the profile W: P1.5,2: F1-1: ST-11 (cc11), has been linked to an increase in endemic meningococcal disease in many regions, including England, South Africa and South America countries, including Brazil, where case fatality rates reached 28% [41–43]. There has been an increase in the number of meningococcal disease cases associated with MenW in South America, including Brazil, where this is now the third most prevalent serogroup [41,44]. Such findings show the need for continuous surveillance, not only phenotypically but including the molecular characterization of the strains, due to the high transmissibility and virulence of the circulating genotype.

There are few reports describing the distribution of the vaccine antigen alleles among *N. meningitidis* carriage isolates [28,45]. Overall, the PorA, PorB and FetA variants identified in this study were highly variable within the same genogroup and cc, as well as the presence of the same antigenic allele in different cc.

This study showed that almost 95% of the isolates lacked NadA, which confirmed the observation that only approximately 5% of the carrier population harbor strains with this protein [46]. In addition, we found an association between NadA and some of the hypervirulent cc including: NadA-1 (cc32); NadA-4 (cc2132) and NadA-2 (cc11) [45,46]. Furthermore, we observed associations such as FHbp 2.102, NHBA 58 and PorB 3–64 variants among *cnl* (cc53) strains; FHbp 1.4, NHBA 10 and PorB 3–84 among *cnl* (cc198) strains; FHbp 3.94, NHBA 600 and PorB 3–84 among *cnl* (cc1136) strains; and NHBA 21 and NHBA 24 associated with MenC cc35 and cc103, respectively, as previously reported [28,45,47].

Considering the MenB-4C vaccine components globally, the NHBA-2 and FHbp 1.1 variants were found in carriage isolates B: P1.18–7.9: F1-5: ST-2120 (cc41/44) and NG: P1.18.25–37: F5-5: ST-823 (cc198), respectively. Some studies reported high cross-reactivity among homologous FHbp-1 subvariants, heterologous NHBA subvariants, and among NadA-1, NadA-2 and NadA-3 variants [48,49]. Moreover, studies on the effectiveness of the MenB-4C vaccine have shown that the presence of at least one of the components may be able to induce protection against both genogroup B and non-genogroup B isolates [50].

In conclusion, this study presents an overview of the molecular diversity and vaccine antigen content of *N. meningitidis* carriage isolates in Salvador, Brazil. Continuous monitoring of antigen variability, including carriage isolates from other age groups, as well as isolates from meningococcal cases, will be needed to monitor the impact of the anti-meningococcal vaccination strategies on the carriage population, as well as to contribute to future public health decisions on vaccine usage.



## Supporting information

**S1 Text. Database.**  
(XLSX)

## Acknowledgments

Ms. Moura received a research scholarship from the postgraduate program at the Instituto Gonçalo Moniz, funded by Fundação de Amparo à Pesquisa do Estado da Bahia. The findings and conclusions in this report are those of the authors and do not necessarily represent the official position of the Centers for Disease Control and Prevention.

## Author Contributions

**Conceptualization:** José Cássio de Moraes, Leila Carvalho Campos.

**Data curation:** Cécilia Batmalle Kretz.

**Formal analysis:** Ana Rafaela Silva Simões Moura, Cécilia Batmalle Kretz, Xin Wang, Leila Carvalho Campos.

**Funding acquisition:** Leila Carvalho Campos.

**Investigation:** Ana Rafaela Silva Simões Moura, Italo Eustáquio Ferreira, Amélia Maria Pithon Borges Nunes.

**Methodology:** Cécilia Batmalle Kretz, José Cássio de Moraes, Xin Wang, Leila Carvalho Campos.

**Project administration:** Leila Carvalho Campos.

**Resources:** Leila Carvalho Campos.

**Supervision:** Xin Wang, Leila Carvalho Campos.

**Validation:** Ana Rafaela Silva Simões Moura, Cécilia Batmalle Kretz, Italo Eustáquio Ferreira.

**Visualization:** Cécilia Batmalle Kretz, Xin Wang, Leila Carvalho Campos.

**Writing – original draft:** Ana Rafaela Silva Simões Moura.

**Writing – review & editing:** Cécilia Batmalle Kretz, Mitermayer Galvão Reis, Alan John Alexander McBride, Xin Wang, Leila Carvalho Campos.

## References

1. Tzeng YL, Stephens DS (2000) Epidemiology and pathogenesis of *Neisseria meningitidis*. *Microbes Infect* 2: 687–700. PMID: [10884620](https://pubmed.ncbi.nlm.nih.gov/10884620/)
2. Caugant DA (1998) Population genetics and molecular epidemiology of *Neisseria meningitidis*. *APMIS* 106: 505–525. PMID: [9674888](https://pubmed.ncbi.nlm.nih.gov/9674888/)
3. Jolley KA, Wilson DJ, Kriz P, McVean G, Maiden MC (2005) The influence of mutation, recombination, population history, and selection on patterns of genetic diversity in *Neisseria meningitidis*. *Mol Biol Evol* 22: 562–569. <https://doi.org/10.1093/molbev/msi041> PMID: [15537808](https://pubmed.ncbi.nlm.nih.gov/15537808/)
4. Maiden MC, Bygraves JA, Feil E, Morelli G, Russell JE, Urwin R, et al. (1998) Multilocus sequence typing: a portable approach to the identification of clones within populations of pathogenic microorganisms. *Proc Natl Acad Sci U S A* 95: 3140–3145. PMID: [9501229](https://pubmed.ncbi.nlm.nih.gov/9501229/)
5. Caugant DA (2008) Genetics and evolution of *Neisseria meningitidis*: importance for the epidemiology of meningococcal disease. *Infect Genet Evol* 8: 558–565. <https://doi.org/10.1016/j.meegid.2008.04.002> PMID: [18479979](https://pubmed.ncbi.nlm.nih.gov/18479979/)

6. Jounio U, Saukkoriipi A, Bratcher HB, Bloigu A, Juvonen R, Silvennoinen-Kassinen S, et al. (2012) Genotypic and phenotypic characterization of carriage and invasive disease isolates of *Neisseria meningitidis* in Finland. *J Clin Microbiol* 50: 264–273. <https://doi.org/10.1128/JCM.05385-11> PMID: [22135261](https://pubmed.ncbi.nlm.nih.gov/22135261/)
7. Jolley KA, Maiden MC (2010) BIGSdb: Scalable analysis of bacterial genome variation at the population level. *BMC Bioinformatics* 11: 595. <https://doi.org/10.1186/1471-2105-11-595> PMID: [21143983](https://pubmed.ncbi.nlm.nih.gov/21143983/)
8. Jolley KA, Brehony C, Maiden MC (2007) Molecular typing of meningococci: recommendations for target choice and nomenclature. *FEMS Microbiol Rev* 31: 89–96. <https://doi.org/10.1111/j.1574-6976.2006.00057.x> PMID: [17168996](https://pubmed.ncbi.nlm.nih.gov/17168996/)
9. Serruto D, Bottomley MJ, Ram S, Giuliani MM, Rappuoli R (2012) The new multicomponent vaccine against meningococcal serogroup B, 4CMenB: immunological, functional and structural characterization of the antigens. *Vaccine* 30 Suppl 2: B87–97.
10. Folaranmi T, Rubin L, Martin SW, Patel M, MacNeil JR, Centers for Disease Control (CDC) (2015) Use of Serogroup B Meningococcal Vaccines in Persons Aged >= 10 Years at Increased Risk for Serogroup B Meningococcal Disease: Recommendations of the Advisory Committee on Immunization Practices, 2015. *MMWR Morb Mortal Wkly Rep* 64: 608–612. PMID: [26068564](https://pubmed.ncbi.nlm.nih.gov/26068564/)
11. Safadi MA, de los Monteros LE, Lopez EL, Saez-Llorens X, Lemos AP, Moreno-Espinosa S, et al. (2013) The current situation of meningococcal disease in Latin America and recommendations for a new case definition from the Global Meningococcal Initiative. *Expert Rev Vaccines* 12: 903–915. <https://doi.org/10.1586/14760584.2013.814879> PMID: [23909747](https://pubmed.ncbi.nlm.nih.gov/23909747/)
12. de Lemos AP, Yara TY, Gorla MC, de Paiva MV, de Souza AL, Gonçalves MI, et al. (2007) Clonal distribution of invasive *Neisseria meningitidis* serogroup C strains circulating from 1976 to 2005 in greater Sao Paulo, Brazil. *J Clin Microbiol* 45: 1266–1273. <https://doi.org/10.1128/JCM.02510-06> PMID: [17314227](https://pubmed.ncbi.nlm.nih.gov/17314227/)
13. Cassio de Moraes J, Kemp B, de Lemos AP, Outeiro Gorla MC, Lemes Marques EG, Ferreira Mdo C, et al. (2015) Prevalence, Risk Factors and Molecular Characteristics of Meningococcal Carriage Among Brazilian Adolescents. *Pediatr Infect Dis J* 34: 1197–1202. <https://doi.org/10.1097/INF.0000000000000853> PMID: [26222063](https://pubmed.ncbi.nlm.nih.gov/26222063/)
14. Safadi MA, Carvalhanas TR, Paula de Lemos A, Gorla MC, Salgado M, Fukasawa LO, et al. (2014) Carriage rate and effects of vaccination after outbreaks of serogroup C meningococcal disease, Brazil, 2010. *Emerg Infect Dis* 20: 806–811. <https://doi.org/10.3201/eid2005.130948> PMID: [24751156](https://pubmed.ncbi.nlm.nih.gov/24751156/)
15. Nunes AM, Ribeiro GS, Ferreira IE, Moura AR, Felzemburgh RD, de Lemos AP, et al. (2016) Meningococcal Carriage among Adolescents after Mass Meningococcal C Conjugate Vaccination Campaigns in Salvador, Brazil. *PLoS One* 11: e0166475. <https://doi.org/10.1371/journal.pone.0166475> PMID: [27861618](https://pubmed.ncbi.nlm.nih.gov/27861618/)
16. O'Brien KL, Bronsdon MA, Dagan R, Yagupsky P, Janco J, Elliott J, et al. (2001) Evaluation of a medium (STGG) for transport and optimal recovery of *Streptococcus pneumoniae* from nasopharyngeal secretions collected during field studies. *J Clin Microbiol* 39: 1021–1024. <https://doi.org/10.1128/JCM.39.3.1021-1024.2001> PMID: [11230421](https://pubmed.ncbi.nlm.nih.gov/11230421/)
17. Dolan Thomas J, Hatcher CP, Satterfield DA, Theodore MJ, Bach MC, Linscott KB, et al. (2011) *sodC*-based real-time PCR for detection of *Neisseria meningitidis*. *PLoS One* 6: e19361. <https://doi.org/10.1371/journal.pone.0019361> PMID: [21573213](https://pubmed.ncbi.nlm.nih.gov/21573213/)
18. Wang X, Theodore MJ, Mair R, Trujillo-Lopez E, du Plessis M, Wolter N, et al. (2012) Clinical validation of multiplex real-time PCR assays for detection of bacterial meningitis pathogens. *J Clin Microbiol* 50: 702–708. <https://doi.org/10.1128/JCM.06087-11> PMID: [22170919](https://pubmed.ncbi.nlm.nih.gov/22170919/)
19. Claus H, Maiden MC, Maag R, Frosch M, Vogel U (2002) Many carried meningococci lack the genes required for capsule synthesis and transport. *Microbiology* 148: 1813–1819. <https://doi.org/10.1099/00221287-148-6-1813> PMID: [12055301](https://pubmed.ncbi.nlm.nih.gov/12055301/)
20. Jacobsson S, Thulin S, Molling P, Unemo M, Comanducci M, Rappuoli R, et al. (2006) Sequence constancies and variations in genes encoding three new meningococcal vaccine candidate antigens. *Vaccine* 24: 2161–2168. <https://doi.org/10.1016/j.vaccine.2005.11.006> PMID: [16321460](https://pubmed.ncbi.nlm.nih.gov/16321460/)
21. Russell JE, Jolley KA, Feavers IM, Maiden MC, Suker J (2004) PorA variable regions of *Neisseria meningitidis*. *Emerg Infect Dis* 10: 674–678. <https://doi.org/10.3201/eid1004.030247> PMID: [15200858](https://pubmed.ncbi.nlm.nih.gov/15200858/)
22. Thompson EA, Feavers IM, Maiden MC (2003) Antigenic diversity of meningococcal enterobactin receptor FetA, a vaccine component. *Microbiology* 149: 1849–1858. <https://doi.org/10.1099/mic.0.26131-0> PMID: [12855736](https://pubmed.ncbi.nlm.nih.gov/12855736/)
23. Tanabe M, Nimigeam CM, Iverson TM (2010) Structural basis for solute transport, nucleotide regulation, and immunological recognition of *Neisseria meningitidis* PorB. *Proc Natl Acad Sci U S A* 107: 6811–6816. <https://doi.org/10.1073/pnas.0912115107> PMID: [20351243](https://pubmed.ncbi.nlm.nih.gov/20351243/)

24. Kretz CB, Retchless AC, Sidikou F, Issaka B, Ousmane S, Schwartz S, et al. (2016) Whole-Genome Characterization of Epidemic *Neisseria meningitidis* Serogroup C and Resurgence of Serogroup W, Niger, 2015. *Emerg Infect Dis* 22: 1762–1768. <https://doi.org/10.3201/eid2210.160468> PMID: [27649262](https://pubmed.ncbi.nlm.nih.gov/27649262/)
25. Gardner SN, Hall BG (2013) When whole-genome alignments just won't work: kSNP v2 software for alignment-free SNP discovery and phylogenetics of hundreds of microbial genomes. *PLoS One* 8: e81760. <https://doi.org/10.1371/journal.pone.0081760> PMID: [24349125](https://pubmed.ncbi.nlm.nih.gov/24349125/)
26. Tamura K, Stecher G, Peterson D, Filipinski A, Kumar S (2013) MEGA6: Molecular Evolutionary Genetics Analysis version 6.0. *Mol Biol Evol* 30: 2725–2729. <https://doi.org/10.1093/molbev/mst197> PMID: [24132122](https://pubmed.ncbi.nlm.nih.gov/24132122/)
27. de Filippis I, Vicente AC (2005) Multilocus sequence typing and repetitive element-based polymerase chain reaction analysis of *Neisseria meningitidis* isolates in Brazil reveal the emergence of 11 new sequence types genetically related to the ST-32 and ST-41/44 complexes and high prevalence of strains related to hypervirulent lineages. *Diagnostic microbiology and infectious disease* 53: 161–167. <https://doi.org/10.1016/j.diagmicrobio.2005.06.015> PMID: [16243472](https://pubmed.ncbi.nlm.nih.gov/16243472/)
28. Gasparini R, Comanducci M, Amicizia D, Ansaldo F, Canepa P, Orsi A, et al. (2014) Molecular and serological diversity of *Neisseria meningitidis* carrier strains isolated from Italian students aged 14 to 22 years. *J Clin Microbiol* 52: 1901–1910. <https://doi.org/10.1128/JCM.03584-13> PMID: [24648565](https://pubmed.ncbi.nlm.nih.gov/24648565/)
29. Yazdankhah SP, Kriz P, Tzanakaki G, Kremastinou J, Kalmusova J, Musilek M, et al. (2004) Distribution of serogroups and genotypes among disease-associated and carried isolates of *Neisseria meningitidis* from the Czech Republic, Greece, and Norway. *J Clin Microbiol* 42: 5146–5153. <https://doi.org/10.1128/JCM.42.11.5146-5153.2004> PMID: [15528708](https://pubmed.ncbi.nlm.nih.gov/15528708/)
30. Hammerschmidt S, Muller A, Sillmann H, Muhlenhoff M, Borrow R, Fox A, et al. (1996) Capsule phase variation in *Neisseria meningitidis* serogroup B by slipped-strand mispairing in the polysialyltransferase gene (*siaD*): correlation with bacterial invasion and the outbreak of meningococcal disease. *Mol Microbiol* 20: 1211–1220. PMID: [8809773](https://pubmed.ncbi.nlm.nih.gov/8809773/)
31. Hoang LM, Thomas E, Tyler S, Pollard AJ, Stephens G, Gustafson L, et al. (2005) Rapid and fatal meningococcal disease due to a strain of *Neisseria meningitidis* containing the capsule null locus. *Clin Infect Dis* 40: e38–42. <https://doi.org/10.1086/427875> PMID: [15714405](https://pubmed.ncbi.nlm.nih.gov/15714405/)
32. Diaz J, Carcamo M, Seoane M, Pidal P, Cavada G, Puentes R, et al. (2016) Prevalence of meningococcal carriage in children and adolescents aged 10–19 years in Chile in 2013. *J Infect Public Health*.
33. Moreno J, Hidalgo M, Duarte C, Sanabria O, Gabastou JM, Ibarz-Pavon AB (2015) Characterization of Carriage Isolates of *Neisseria meningitidis* in the Adolescents and Young Adults Population of Bogota (Colombia). *PLoS One* 10: e0135497. <https://doi.org/10.1371/journal.pone.0135497> PMID: [26322796](https://pubmed.ncbi.nlm.nih.gov/26322796/)
34. Cardoso CW, Pinto LL, Reis MG, Flannery B, Reis JN (2012) Impact of vaccination during an epidemic of serogroup C meningococcal disease in Salvador, Brazil. *Vaccine* 30: 5541–5546. <https://doi.org/10.1016/j.vaccine.2012.06.044> PMID: [22749604](https://pubmed.ncbi.nlm.nih.gov/22749604/)
35. Maiden MC, Stuart JM (2002) Carriage of serogroup C meningococci 1 year after meningococcal C conjugate polysaccharide vaccination. *Lancet* 359: 1829–1831. [https://doi.org/10.1016/S0140-6736\(02\)08679-8](https://doi.org/10.1016/S0140-6736(02)08679-8) PMID: [12044380](https://pubmed.ncbi.nlm.nih.gov/12044380/)
36. Claus H, Maiden MC, Wilson DJ, McCarthy ND, Jolley KA, Urwin R, et al. (2005) Genetic analysis of meningococci carried by children and young adults. *J Infect Dis* 191: 1263–1271. <https://doi.org/10.1086/428590> PMID: [15776372](https://pubmed.ncbi.nlm.nih.gov/15776372/)
37. Chang Q, Tzeng YL, Stephens DS (2012) Meningococcal disease: changes in epidemiology and prevention. *Clinical epidemiology* 4: 237–245. <https://doi.org/10.2147/CLEP.S28410> PMID: [23071402](https://pubmed.ncbi.nlm.nih.gov/23071402/)
38. Santos MV. Caracterização fenotípica e genotípica de cepas invasivas de *Neisseria meningitidis* sorogruppo Y isoladas no Brasil durante o período de 2007 a 2011[dissertation]. Secretaria de Estado da Saúde de São Paulo;2015.
39. Gorla MC, de Lemos AP, Quaresma M, Vilasboas R, Marques O, de Sá MU, et al. (2012) Phenotypic and molecular characterization of serogroup C *Neisseria meningitidis* associated with an outbreak in Bahia, Brazil. *Enferm Infecc Microbiol Clin* 30: 56–59. <https://doi.org/10.1016/j.eimc.2011.07.022> PMID: [22078548](https://pubmed.ncbi.nlm.nih.gov/22078548/)
40. de Filippis I, de Lemos AP, Hostetler JB, Wollenberg K, Sacchi CT, Dunning Hotopp JC, et al. (2012) Molecular epidemiology of *Neisseria meningitidis* serogroup B in Brazil. *PLoS One* 7: e33016. <https://doi.org/10.1371/journal.pone.0033016> PMID: [22431994](https://pubmed.ncbi.nlm.nih.gov/22431994/)
41. Abad R, Lopez EL, Debbag R, Vazquez JA (2014) Serogroup W meningococcal disease: global spread and current affect on the Southern Cone in Latin America. *Epidemiology and infection* 142: 2461–2470. <https://doi.org/10.1017/S0950268814001149> PMID: [24831052](https://pubmed.ncbi.nlm.nih.gov/24831052/)

42. Lucidarme J, Hill DM, Bratcher HB, Gray SJ, du Plessis M, Tsang RS, et al. (2015) Genomic resolution of an aggressive, widespread, diverse and expanding meningococcal serogroup B, C and W lineage. *J Infect* 71: 544–552. <https://doi.org/10.1016/j.jinf.2015.07.007> PMID: 26226598
43. Weidlich L, Baethgen LF, Mayer LW, Moraes C, Klein CC, Nunes LS, et al. (2008) High prevalence of *Neisseria meningitidis* hypervirulent lineages and emergence of W135:P1.5.2:ST-11 clone in Southern Brazil. *J Infect* 57: 324–331. <https://doi.org/10.1016/j.jinf.2008.07.014> PMID: 18814914
44. Lemos APSH L. H., Lenser M.; Sacchi C. T. (2010) Phenotypic and molecular characterization of invasive serogroup W135 *Neisseria meningitidis* strains from 1990 to 2005 in Brazil. *J Infect* 60: 209–217. <https://doi.org/10.1016/j.jinf.2009.11.014> PMID: 20056121
45. Lucidarme J, Comanducci M, Findlow J, Gray SJ, Kaczmarek EB, Guiver M, et al. (2010) Characterization of *fHbp*, *nhba* (gna2132), *nadA*, *porA*, and sequence type in group B meningococcal case isolates collected in England and Wales during January 2008 and potential coverage of an investigational group B meningococcal vaccine. *Clin Vaccine Immunol* 17: 919–929. <https://doi.org/10.1128/CVI.00027-10> PMID: 20375242
46. Comanducci M, Bambini S, Caugant DA, Mora M, Brunelli B, Capocchi B, et al. (2004) NadA diversity and carriage in *Neisseria meningitidis*. *Infect Immun* 72: 4217–4223. <https://doi.org/10.1128/IAI.72.7.4217-4223.2004> PMID: 15213166
47. Claus H, Jördens MS, Kriz P, Musilek M, Jarva H, Pawlik MC, et al. (2012) Capsule null locus meningococci: Typing of antigens used in an investigational multicomponent meningococcus serogroup B vaccine. *Vaccine* 30: 155–160. <https://doi.org/10.1016/j.vaccine.2011.11.050> PMID: 22107847
48. Vogel U, Taha MK, Vazquez JA, Findlow J, Claus H, Stefanelli P, et al. (2013) Predicted strain coverage of a meningococcal multicomponent vaccine (4CMenB) in Europe: a qualitative and quantitative assessment. *The Lancet Infectious diseases* 13: 416–425. [https://doi.org/10.1016/S1473-3099\(13\)70006-9](https://doi.org/10.1016/S1473-3099(13)70006-9) PMID: 23414709
49. Wasko I, Hong E, De Paola R, Stella M, Moschioni M, Taha MK, et al. (2016) High predicted strain coverage by the multicomponent meningococcal serogroup B vaccine (4CMenB) in Poland. *Vaccine* 34: 510–515. <https://doi.org/10.1016/j.vaccine.2015.11.070> PMID: 26686998
50. Donnelly J, Medini D, Boccadifuoco G, Biolchi A, Ward J, Frasch C, et al. (2010) Qualitative and quantitative assessment of meningococcal antigens to evaluate the potential strain coverage of protein-based vaccines. *Proceedings of the National Academy of Sciences of the United States of America* 107: 19490–19495. <https://doi.org/10.1073/pnas.1013758107> PMID: 20962280
